# Supplementary material for: Inferring the Chemotactic Strategy of P. putida and E. coli Using Modified Kramers-Moyal Coefficients
Source: PLOS journal article supplement (doi:10.1371/journal.pcbi.1005329), 2017-01-23
Supplement: S1 (10.1371/journal.pcbi.1005329.s001) [file journal.pcbi.1005329.s001]

## S1. Calculating odd CMs

Calculating the CMs for odd power  $n$  is not straightforward because they are defined with absolute values as base. Here, we explain in detail the calculations of the first and third moments.

Using the identity  $|a + b| = 2 \max(a, -b) - a + b$ , we obtain for the first moment:

$$\begin{aligned} m_{\Delta t}^1(\theta)[\Theta] &= \langle |dN_{\Delta t} + dB_{\Delta t}| / \Delta t \mid \Theta(t) = \theta \rangle \\ &= \langle 2 \max(dB, -dN) - dB + dN \rangle / \Delta t. \end{aligned} \quad (1)$$

As in the main text, when no condition is specified in the average  $\langle \cdot \rangle$ , we refer to the mean conditioned on the orientation  $\Theta = \theta$  prior to a tumble event. Since the mean of the increments  $dB$  and  $dN$  vanishes, we have:

$$m_{\Delta t}^1(\theta)[\Theta] = \langle 2 \max(dB, -dN) \rangle / \Delta t. \quad (2)$$

Next, we investigate the maximum function in cases when a tumble occurs or does not occur and when there is rightward ( $dN < 0$ ) or leftward ( $dN > 0$ ) tumbling. We obtain

$$\langle 2 \max(dB, -dN) \rangle / \Delta t \approx 2(1 - \lambda \Delta t) 0.5 \frac{\langle |dB| \rangle}{\Delta t} + 2\lambda 0.5 \langle |\beta| \rangle + 2\lambda 0.5 \langle dB \rangle. \quad (3)$$

Here, the first term on the right-hand side represents the case when no tumble occurs and when  $dB > 0$ . This happens with probability  $0.5(1 - \lambda \Delta t)$  since the two increments are assumed to be uncorrelated. The second term on the right-hand side represents a rightward tumble ( $dN < 0$ ), where we assumed  $|dB| < |dN|$  because typically the tumble angles are much larger than the thermally induced angular displacements. The third term appears for  $dN > 0$ . However, as before, the mean of the Gaussian increment vanishes. Hence, we finally obtain:

$$m_{\Delta t}^1(\theta)[\Theta] = (1 - \lambda \Delta t) \langle |dB| \rangle / \Delta t + \lambda \langle |\beta| \rangle. \quad (4)$$

Similarly, we determine the third moment:

$$m_{\Delta t}^3(x)[\Theta] = \langle 2 \max(dN^3 + dB^3, -3dN^2dB - 3dB^2dN) \rangle / \Delta t \quad (5)$$

$$\approx (1 - \lambda \Delta t) \langle |dB|^3 \rangle / \Delta t + \lambda \langle |\beta|^3 \rangle + 6\lambda \Delta t D_{\text{rot}} \langle |\beta| \rangle. \quad (6)$$

The first term in the second line refers to a situation without tumbling such that the second argument of the maximum function in the first line vanishes. The second term occurs for leftward tumbling ( $dN > 0$ ), again assuming  $|dB| < |dN|$ . Finally, for rightward tumbling ( $dN < 0$ ), the second argument of the maximum function is larger than the first and only the last term  $3dB^2dN$  has a non-zero average.
